# Supplementary material for: Tdp-43 cryptic exons are highly variable between cell types
Source: Mol Neurodegener. 2017 Feb 2;12:13. doi: 10.1186/s13024-016-0144-x (PMC5289002; doi:10.1186/s13024-016-0144-x)
Supplement: Additional file 2: — Cryptic Exon Data Table. (XLSX 59 kb) [file 13024_2016_144_MOESM2_ESM.xlsx]

## Sheet: Mouse Cryptic Exons
Gene Symbol	UCSC ID	Cryptic Exon Location (mm9)	Cryptic Exon (bp)	Present in Stem Cell	Present in Neuron	Present in Myocyte	Inf. Ins.	UTR	Start Site	PolyA	Exon Ext.	Predicted NMD	Stem Cell Cryptic PSI	Neuron Cryptic PSI	Myocyte Cryptic PSI	Stem Cell CTRL (FPKM)	Stem Cell KO (FPKM)	Stem Cell CTRL vs KO (FC)	Neuron CTRL (FPKM)	Neuron KO (FPKM)	Neuron CTRL vs KO (FC)	Myocyte CTRL (FPKM)	Myocyte KO (FPKM)	Myocyte CTRL vs KO (FC)
Pnpla6	uc009krr.1	chr8:3524948-3525233	286	Y	Y	Y				Y		N	56	44	73	4.36122	0.384987	-11.3282	3.72019	2.95156	-1.26041	0.152419	0.977482	6.41312
Tbc1d1	uc008xmm.1	chr5:64731056-64731165	110	Y	Y	Y						Y	64	44	22	0.545226	0.0503796	-10.8224	4.08584	2.40466	-1.69913	3.23419	0.65955	-4.90363
Usp15	uc007hgo.1	chr10:122588018-122588181	164	Y	Y	Y						Y	82.2785	14	39	17.8697	1.9566	-9.13304	5.43578	3.6847	-1.47523	19.0289	4.05584	-4.69173
Usp15	uc007hgo.1	chr10:122588018-122600648	12631	Y	Y	Y					Y	Y	86	14	39	17.8697	1.9566	-9.13304	5.43578	3.6847	-1.47523	19.0289	4.05584	-4.69173
Adipor2	uc009dme.1	chr6:119319878-119319936	59	Y	Y	Y						Y	74.3041	13	36	76.2613	23.7755	-3.20756	14.5363	15.1938	1.04523	18.8987	10.9872	-1.72007
Chd1l	uc008qow.1	chr3:97395284-97395697	414	Y	Y	Y					Y	Y	4	52	75	22.9776	9.80456	-2.34356	2.96868	5.13868	1.73096	5.4967	2.75089	-1.99815
Ptcd2	uc007rpm.1	chr13:100096403-100096525	123	Y	Y	Y						Y	23.0769	11	77	34.659	14.9049	-2.32534	13.3231	11.1554	-1.19432	16.6734	5.44061	-3.06462
Slc7a6	uc009nfm.1	chr8:108692855-108693156	302	Y	Y	Y			Y			N	44	59	92	11.2276	6.19202	-1.81324	2.94131	2.84292	-1.03461	1.44581	0.847041	-1.70689
Pycr2	uc007dwv.2	chr1:182834662-182834702	41	Y	Y	Y					Y	Y	13.0152	49	5	124.4	77.0443	-1.61466	16.5812	13.9443	-1.1891	9.75537	6.20866	-1.57125
Tecpr1	uc009alj.1	chr5:144976607-144976659	53	Y	Y	Y						Y	97.8261	35	52	2.9398	1.86934	-1.57264	17.4734	4.30915	-4.05495	3.41162	0.856464	-3.98338
3110009E18Rik	uc007cjh.2	chr1:122022910-122022969	60	Y	Y	Y		Y				N	67	33	23	5.15047	3.66438	-1.40555	1.43229	1.54007	1.07525	4.18339	0.946506	-4.41982
Rrp36	uc008ctu.1	chr17:46810105-46810288	184	Y	Y	Y						Y	13	26	9	35.1281	25.0792	-1.40069	8.04829	8.62939	1.0722	7.16629	7.19678	1.00425
Wbscr22	uc008zxm.1	chr5:135539651-135539753	103	Y	Y	Y					Y	Y	34.7973	23	39.5	64.3072	46.5571	-1.38125	11.2141	12.6852	1.13118	13.3366	10.4038	-1.2819
Sars	uc008qzb.1	chr3:108245655-108245759	105	Y	Y	Y						Y	1.34399	3	11	238.734	173.298	-1.37759	48.0048	43.3162	-1.10824	46.44	20.9153	-2.22038
Hgsnat	uc009lhg.1	chr8:27056421-27056468	48	Y	Y	Y						N	17.1315	34	45	22.5903	16.5183	-1.36759	16.7087	18.7687	1.12329	9.49744	6.56209	-1.44732
Ggct	uc009cah.1	chr6:54942069-54942165	97	Y	Y	Y						Y	5.38922	47	32	24.3308	18.1063	-1.34378	8.6394	4.44046	-1.94561	7.22145	1.73031	-4.1735
Brms1l	uc007npa.1	chr12:56964161-56966078	1918	Y	Y	Y					Y	Y	9	21	81	15.7223	11.8905	-1.32226	23.5959	11.2673	-2.09419	7.43821	3.67538	-2.02379
Synj2bp	uc007oca.1	chr12:82610794-82611038	245	Y	Y	Y				Y		N	79.4749	72	99	17.1782	13.1259	-1.30873	15.5282	13.5984	-1.14191	16.7607	8.38095	-1.99986
2610507B11Rik	uc007kir.2	chr11:78077562-78077768	207	Y	Y	Y					Y	Y	26.3158	1	30	55.0125	42.8462	-1.28395	39.4322	31.3951	-1.256	69.507	33.4258	-2.07944
Pno1	uc007icc.1	chr11:17108384-17108667	284	Y	Y	Y						Y	8.66976	2	10.5	89.008	72.6212	-1.22565	14.1316	15.3483	1.0861	40.7124	36.0708	-1.12868
Spata7	uc007ora.1	chr12:99872801-99872854	54	Y	Y	Y	Y					N	100	100	100	7.4388	6.58299	-1.13	6.26227	4.57009	-1.37027	0.196772	1.09967	5.58855
Brd9	uc007rej.1	chr13:74090298-74090335	38	Y	Y	Y						Y	23	17	36	11.4997	10.4796	-1.09734	14.2	15.2	1.1	3.08231	2.7034	-1.14016
Mier1	uc008txi.1	chr4:102834377-102834447	71	Y	Y	Y						N	10.7246	19	30	10.2291	9.49724	-1.07706	2.11263	2.01172	-1.05016	3.30839	3.06869	-1.07811
Smg5	uc008put.1	chr3:88144571-88144780	210	Y	Y	Y						Y	26.4781	19	68	41.7421	39.0508	-1.06892	16.1512	16.252	1.00624	11.048	22.9228	2.07484
Smg5	uc008put.1	chr3:88144571-88144685	115	Y	Y	Y						Y	33.0211	24	68	41.7421	39.0508	-1.06892	16.1512	16.252	1.00624	11.048	22.9228	2.07484
Hdac4	uc007cbf.1	chr1:94038097-94038158	62	Y	Y	Y						Y	26	20	100	1.01237	0.967854	-1.04599	4.52654	3.74783	-1.20778	2.10034	4.5549	2.16865
Ift81	uc008zlm.2	chr5:123006915-123007000	86	Y	Y	Y						Y	29	41	28	5.72224	5.48627	-1.04301	9.83223	10.0363	1.02076	0.954526	2.19877	2.30352
Adnp2	uc008fsk.1	chr18:80334892-80335043	152	Y	Y	Y						Y	95.6757	76	100	27.6964	28.186	1.01768	5.5718	7.31133	1.3122	0.901658	2.7576	3.05837
Rtfdc1	uc008ocw.1	chr2:172290952-172291773	822	Y	Y	Y					Y	Y	2	5	1	32.9599	33.7038	1.02257	28.0058	26.3216	-1.06399	15.2169	10.7349	-1.41752
Fam135a	uc007amk.2	chr1:24029346-24031051	1706	Y	Y	Y					Y	Y	55	29	48.5	1.26765	1.39033	1.09678	1.1275	2.04698	1.8155	2.87433	1.67265	-1.71843
Spcs2	uc009imd.1	chr7:107004923-107005024	102	Y	Y	Y	Y					N	15.122	20	9	30.7827	36.7992	1.19545	21.3433	25.2345	1.18231	16.0401	16.3539	1.01956
Crem	uc008dxl.2	chr18:3278079-3278238	160	Y	Y	Y			Y			N	100	68	80	0.0130459	0.385046	29.5147	2.38626	0.938642	-2.54225	1.0985	1.71336	1.55973
A230046K03Rik	uc007gkj.1	chr10:83023672-83023869	198	Y	Y							Y	80	20	--	29.069	9.06341	-3.20729	9.21136	5.07154	-1.81628	--	--	--
Hace1	uc007fad.2	chr10:45359574-45359609	36	Y	Y		Y					N	50.7692	30	--	10.5316	7.69131	-1.36929	10.1429	7.93487	-1.27827	--	--	--
Abr	uc007kft.1	chr11:76278083-76282079	3997	Y	Y							Y	32	4	--	8.72267	6.47337	-1.34747	59.6724	20.3733	-2.92895	--	--	--
Ift81	uc008zlm.2	chr5:123006942-123007000	59	Y	Y							Y	22	21	--	5.72224	5.48627	-1.04301	9.83223	10.0363	1.02076	--	--	--
Vps13d	uc012dox.1	chr4:144689255-144689366	112	Y	Y							Y	18	46	--	6.80373	6.95206	1.0218	4.56005	1.87133	-2.4368	--	--	--
Radil	uc009ait.1	chr5:142983773-142983862	90	Y	Y							Y	25	100	--	4.60865	4.76072	1.033	1.45952	0.578651	-2.52228	--	--	--
Rap1b	uc007hdr.1	chr10:117253243-117253402	160	Y	Y			3'UTR				N	2	7	--	52.8235	59.5811	1.12793	32.5587	27.069	-1.2028	--	--	--
Kctd10	uc008yzm.2	chr5:114826780-114826875	96	Y	Y		Y					N	34	33	--	11.0672	18.5127	1.67275	15.6767	16.341	1.04237	--	--	--
Uggt2	uc007uzj.2	chr14:119399951-119400992	1042	Y	Y						Y	Y	68.0328	30	--	5.95922	13.5326	2.27087	2.13469	4.15828	1.94795	--	--	--
Nme6	uc009rst.1	chr9:109740387-109740534	148	Y		Y						Y	18.6992	--	26.5	25.6676	12.0149	-2.13631	--	--	--	20.8479	9.53374	-2.18675
Mettl10	uc009kcm.1	chr7:140026312-140026364	53	Y		Y						Y	8	--	62.5	21.9013	12.5288	-1.74808	--	--	--	4.17933	3.81638	-1.0951
Gtf2e2	uc009lki.2	chr8:34848447-34849451	1005	Y		Y				Y		N	32.1569	--	8	45.8828	29.4519	-1.55789	--	--	--	5.71123	5.58762	-1.02212
Mettl6	uc007sxq.1	chr14:32302355-32302505	151	Y		Y						Y	9.9768	--	15	20.7256	15.862	-1.30662	--	--	--	3.08112	3.14752	1.02155
Tnks2	uc008hhu.2	chr19:36951510-36953724	2215	Y		Y					Y	Y	3.22034	--	10	148.389	118.343	-1.25389	--	--	--	32.8941	24.4804	-1.34369
Ube2d1	uc007foo.2	chr10:70726333-70726465	133	Y		Y						Y	71	--	46	5.87364	4.83865	-1.2139	--	--	--	193.797	116.15	-1.66851
Ppp6c	uc008joi.1	chr2:39056407-39060352	3946	Y		Y					Y	Y	32.5444	--	27	49.3798	41.7725	-1.18211	--	--	--	27.3524	23.5459	-1.16166
Cluh	uc007kca.1	chr11:74463197-74463680	484	Y		Y					Y	Y	37.3333	--	20	13.6776	11.6207	-1.177	--	--	--	13.7111	6.97395	-1.96605
Ppap2a	uc007rwr.1	chr13:113596569-113596634	66	Y		Y						Y	9	--	9	42.3245	45.2127	1.06824	--	--	--	16.3105	18.9544	1.1621
Fam96a	uc009qel.1	chr9:65985845-65985946	102	Y		Y	Y					N	2	--	7.5	55.3449	60.7389	1.09746	--	--	--	44.0797	38.4258	-1.14714
Lmbr1	uc008wug.1	chr5:29672685-29672822	138	Y		Y						Y	11	--	65.5	3.40727	3.96678	1.16421	--	--	--	4.49915	3.60242	-1.24892
Edem2	uc008nlg.2	chr2:155544126-155545223	1098	Y		Y					Y	Y	48.3871	--	57	9.8585	12.9825	1.31688	--	--	--	1.85963	2.63597	1.41747
Pir	uc009uvl.2	chrX:160707610-160707645	36	Y		Y		Y			Y	N	45.4082	--	38	14.1496	20.4241	1.44344	--	--	--	3.94131	2.48203	-1.58794
Trim8	uc008hts.1	chr19:46577504-46581418	3915	Y		Y					Y	N	56.8773	--	37	28.4034	45.285	1.59435	--	--	--	7.30744	7.8644	1.07622
Uggt2	uc007uzj.2	chr14:119399951-119400486	536	Y		Y						Y	34	--	34.5	5.95922	13.5326	2.27087	--	--	--	0.111116	0.645638	5.81049
Spata13	uc011zna.1	chr14:61321802-61321959	158	Y					Y			N	45.4545	--	--	3.59526	0.519027	-6.92692	--	--	--	--	--	--
Fam73a	uc008rte.2	chr3:151955521-151955675	155	Y								Y	51.6129	--	--	13.3647	4.12214	-3.24218	--	--	--	--	--	--
Atraid	uc008www.2	chr5:31354907-31355004	98	Y							Y	Y	17.757	--	--	40.089	21.4397	-1.86985	--	--	--	--	--	--
Mib1	uc008ebc.1	chr18:10769157-10769215	59	Y								Y	32.8767	--	--	10.3424	5.53176	-1.86964	--	--	--	--	--	--
Gsta4	uc009qty.2	chr9:78055004-78055045	42	Y			Y					N	8.84299	--	--	596.228	326.559	-1.82579	--	--	--	--	--	--
Lnp	uc008kdq.2	chr2:74372672-74372725	54	Y								Y	19.2488	--	--	3.76397	2.95887	-1.2721	--	--	--	--	--	--
Necap1	uc009dpt.1	chr6:122825542-122825633	92	Y								Y	11.0204	--	--	35.2526	31.2394	-1.12847	--	--	--	--	--	--
Snapc3	uc008tku.1	chr4:83083491-83083627	137	Y								Y	8.30769	--	--	8.20969	7.49192	-1.09581	--	--	--	--	--	--
Sulf1	uc007aia.2	chr1:12830579-12831017	439	Y							Y	Y	24.6269	--	--	9.79309	8.99239	-1.08904	--	--	--	--	--	--
Zfp809	uc009oof.2	chr9:22040980-22041097	118	Y						Y		N	27.9412	--	--	14.7777	14.5584	-1.01506	--	--	--	--	--	--
Zfp13	uc008ash.2	chr17:23721716-23721905	190	Y						Y		N	35.8382	--	--	12.7991	12.9531	1.01203	--	--	--	--	--	--
Ercc6	uc007sze.1	chr14:33355101-33355215	115	Y								Y	37.5	--	--	3.12959	3.5735	1.14184	--	--	--	--	--	--
Tnfaip1	uc007kjr.2	chr11:78342265-78342360	96	Y			Y					N	15.7895	--	--	6.45929	8.63161	1.33631	--	--	--	--	--	--
Fam21	uc009djs.2	chr6:116191061-116191169	109	Y								Y	5.09554	--	--	41.8746	56.194	1.34196	--	--	--	--	--	--
Sptbn4	uc009fwa.1	chr7:28180377-28180650	274	Y				Y	Y			N	42.2222	--	--	2.60519	3.57794	1.37339	--	--	--	--	--	--
Tnnt1	uc012ewu.1	chr7:4457602-4457736	135	Y								N	29.5775	--	--	2.12958	3.35863	1.57713	--	--	--	--	--	--
Flnb	uc007sek.1	chr14:8767880-8768447	568	Y							Y	Y	11.5942	--	--	22.8332	40.2664	1.7635	--	--	--	--	--	--
Ahnak	uc008goj.1	chr19:9064934-9065298	365	Y				Y	Y			N	6.96379	--	--	24.0474	125.676	5.22618	--	--	--	--	--	--
Letm1	uc008xbi.1	chr5:34122223-34122253	31		Y	Y						Y	--	32	5	--	--	--	21.5633	20.6067	-1.04642	18.0461	5.05568	-3.56947
Mcoln1	uc009krq.1	chr8:3513301-3513555	255		Y	Y						Y	--	20	18	--	--	--	18.3695	14.3617	-1.27906	10.593	4.83618	-2.19037
Mrps6	uc007zyu.1	chr16:92096292-92096397	106		Y	Y						Y	--	10	10	--	--	--	29.8452	18.316	-1.62946	24.8174	13.8066	-1.7975
Mical2	uc009jgo.2	chr7:119398244-119398745	502		Y	Y				Y		N	--	18	100	--	--	--	71.7263	51.2147	-1.4005	16.0011	10.9811	-1.45715
Pkia	uc008oof.1	chr3:7368316-7368393	78		Y	Y		Y				N	--	7	32	--	--	--	57.4844	82.0606	1.42753	231.256	171.337	-1.34971
Drosha	uc007vib.2	chr15:12762977-12763144	168		Y	Y						Y	--	38	12	--	--	--	21.7217	16.3247	-1.3306	10.3344	8.19992	-1.2603
Plekha6	uc007cpu.2	chr1:135158452-135159587	1136		Y	Y						Y	--	30	10	--	--	--	6.4314	7.48161	1.16329	0.42523	0.406216	-1.04681
Ssbp2	uc007rjv.2	chr13:91678359-91678409	51		Y	Y						Y	--	15	11	--	--	--	9.46118	10.4896	1.1087	1.87952	1.80128	-1.04344
Ncs1	uc008jdq.1	chr2:31143004-31143039	36		Y	Y		3'UTR				N	--	9	84.5	--	--	--	93.9401	71.9145	-1.30627	1.54479	2.82827	1.83084
Zbtb16	uc009pim.1	chr9:48469634-48469707	74		Y	Y						Y	--	11	25.5	--	--	--	9.03329	7.10229	-1.27188	4.90104	13.7504	2.80561
Abr	uc007kft.1	chr11:76277793-76282079	4287		Y						Y	Y	--	12	--	--	--	--	59.6724	20.3733	-2.92895	--	--	--
Abr	uc007kft.1	chr11:76281757-76282079	323		Y							Y	--	8	--	--	--	--	59.6724	20.3733	-2.92895	--	--	--
Dlg3	uc009twm.2	chrX:97969004-97969071	68		Y							Y	--	11	--	--	--	--	16.9629	6.20019	-2.73587	--	--	--
Ralgps2	uc007dcx.2	chr1:158746064-158746095	32		Y							Y	--	50	--	--	--	--	7.07139	2.67729	-2.64125	--	--	--
Cacna1b	uc008ipe.1	chr2:24547480-24547585	106		Y							Y	--	83	--	--	--	--	7.64163	3.03556	-2.51737	--	--	--
Pitpnm3	uc007jya.1	chr11:71870101-71870196	96		Y							Y	--	30	--	--	--	--	6.7839	2.78558	-2.43536	--	--	--
Celf5	uc007gie.2	chr10:80932583-80932711	129		Y							Y	--	19	--	--	--	--	8.5538	3.63334	-2.35425	--	--	--
Tctn2	uc008zqh.2	chr5:125053858-125057033	3176		Y						Y	Y	--	48	--	--	--	--	7.225	3.52369	-2.05041	--	--	--
Slit3	uc007ild.2	chr11:35131153-35132546	1394		Y							Y	--	50	--	--	--	--	10.2699	5.1606	-1.99006	--	--	--
Slit3	uc007ild.2	chr11:35133328-35133517	190		Y							Y	--	20	--	--	--	--	10.2699	5.1606	-1.99006	--	--	--
Slit3	uc007ild.2	chr11:35133856-35136003	2148		Y					Y		N	--	41	--	--	--	--	10.2699	5.1606	-1.99006	--	--	--
Unc13a	uc009mei.2	chr8:74191228-74191271	44		Y							Y	--	38	--	--	--	--	30.1146	17.7636	-1.6953	--	--	--
Kcnmb4	uc007hbw.1	chr10:115880828-115880968	141		Y							Y	--	18	--	--	--	--	43.5911	29.9809	-1.45396	--	--	--
Add2	uc009cre.1	chr6:86041466-86041557	92		Y							Y	--	3	--	--	--	--	38.8847	27.2026	-1.42945	--	--	--
Meis2	uc008lqt.2	chr2:115888892-115888923	32		Y						Y	Y	--	22	--	--	--	--	3.78515	2.66551	-1.42005	--	--	--
Cdh22	uc008nxc.2	chr2:165008739-165008871	133		Y			Y				N	--	58	--	--	--	--	4.64091	3.33238	-1.39267	--	--	--
Fxyd2	uc009pfv.1	chr9:45217129-45217256	128		Y							Y	--	69	--	--	--	--	3.60718	2.68033	-1.3458	--	--	--
Rasal1	uc008zhr.1	chr5:121103275-121103516	242		Y							Y	--	24	--	--	--	--	12.8724	9.57062	-1.34499	--	--	--
Rasal1	uc008zhr.1	chr5:121103779-121103888	110		Y							Y	--	14	--	--	--	--	12.8724	9.57062	-1.34499	--	--	--
Lurap1l	uc008tjv.1	chr4:80599233-80599305	73		Y							N	--	10	--	--	--	--	22.0428	16.5437	-1.3324	--	--	--
Aatk	uc007mrm.2	chr11:119869942-119870003	62		Y							N	--	9	--	--	--	--	13.3514	10.2906	-1.29744	--	--	--
Arhgef4	uc007api.1	chr1:34860376-34860746	371		Y			Y				N	--	4	--	--	--	--	88.1585	69.3733	-1.27078	--	--	--
Ap3b2	uc009iby.1	chr7:88635065-88635163	99		Y							Y	--	16	--	--	--	--	30.138	23.7584	-1.26852	--	--	--
St6galnac5	uc008rtu.1	chr3:152504152-152506379	2228		Y							Y	--	14	--	--	--	--	65.2101	53.3866	-1.22147	--	--	--
Ppp3ca	uc008rmg.1	chr3:136339898-136340253	356		Y				Y			N	--	9	--	--	--	--	360.04	298.289	-1.20702	--	--	--
Mrps27	uc007rpn.1	chr13:100128905-100132919	4015		Y						Y	Y	--	13	--	--	--	--	10.5654	8.76287	-1.2057	--	--	--
Lrrc49	uc009pzf.2	chr9:60485456-60485476	21		Y		Y					N	--	19	--	--	--	--	10.9018	9.19045	-1.18621	--	--	--
Kalrn	uc012aew.1	chr16:33995419-33995510	92		Y							Y	--	26	--	--	--	--	7.01108	6.12722	-1.14425	--	--	--
R3hdm2	uc007hjl.2	chr10:126889703-126889747	45		Y		Y				Y	N	--	8	--	--	--	--	20.7656	18.2163	-1.13995	--	--	--
Ntrk3	uc009hxh.2	chr7:85634947-85635385	439		Y							Y	--	17	--	--	--	--	15.7248	13.8004	-1.13945	--	--	--
Src	uc008npb.1	chr2:157257346-157257451	106		Y			Y				N	--	60	--	--	--	--	22.125	19.5395	-1.13232	--	--	--
Cx3cl1	uc009mwx.1	chr8:97298977-97299173	197		Y							Y	--	7	--	--	--	--	137.241	121.692	-1.12777	--	--	--
Ak5	uc008rtq.1	chr3:152298921-152306879	7959		Y					Y		N	--	5	--	--	--	--	92.0246	82.121	-1.1206	--	--	--
Tub	uc009jdf.1	chr7:116168888-116169121	234		Y						Y	Y	--	12	--	--	--	--	43.149	39.2619	-1.099	--	--	--
Ip6k1	uc009roc.1	chr9:107940950-107941005	56		Y							Y	--	4	--	--	--	--	47.1629	45.9738	-1.02586	--	--	--
Chga	uc007oui.1	chr12:103796508-103796675	168		Y						Y	Y	--	16	--	--	--	--	46.043	44.8992	-1.02547	--	--	--
Cd200	uc007zim.1	chr16:45390084-45390297	214		Y			3'UTR				N	--	8	--	--	--	--	33.741	33.1059	-1.01918	--	--	--
Slc45a1	uc008vxt.1	chr4:150004509-150004563	55		Y							N	--	46	--	--	--	--	11.548	11.7418	1.01678	--	--	--
Cluh	uc007kca.1	chr11:74463592-74463680	89		Y							Y	--	49	--	--	--	--	12.5543	12.8125	1.02057	--	--	--
Sncb	uc007qpc.1	chr13:54867186-54867375	190		Y			Y				N	--	18	--	--	--	--	170.116	175.982	1.03448	--	--	--
Sncb	uc007qpc.1	chr13:54867276-54867299	24		Y			Y				N	--	14	--	--	--	--	170.116	175.982	1.03448	--	--	--
Sncb	uc007qpc.1	chr13:54867276-54867351	76		Y			Y				N	--	22	--	--	--	--	170.116	175.982	1.03448	--	--	--
Rbfox1	uc007yce.2	chr16:5999507-5999571	65		Y			Y				N	--	8	--	--	--	--	10.238	10.6906	1.04421	--	--	--
Gabra1	uc007imf.1	chr11:41993978-41994160	183		Y			Y				N	--	16	--	--	--	--	72.3162	78.8293	1.09006	--	--	--
Ssbp2	uc007rjv.2	chr13:91678217-91678409	193		Y							Y	--	5	--	--	--	--	9.46118	10.4896	1.1087	--	--	--
Glis2	uc007xzw.1	chr16:4612002-4612527	526		Y					Y		N	--	54	--	--	--	--	2.25537	2.56903	1.13907	--	--	--
Ank3	uc007fna.1	chr10:69338074-69340577	2504		Y						Y	Y	--	36	--	--	--	--	6.26079	7.31653	1.16863	--	--	--
Rfx1	uc009mlv.2	chr8:86610298-86610343	46		Y							Y	--	41	--	--	--	--	3.21184	3.82869	1.19206	--	--	--
Camk1g	uc007eel.1	chr1:195195061-195195146	86		Y			Y				N	--	71	--	--	--	--	9.45813	11.6528	1.23204	--	--	--
Numbl	uc009fvq.1	chr7:28046027-28046126	100		Y							Y	--	31	--	--	--	--	35.291	43.5997	1.23543	--	--	--
Crlf1	uc009maj.1	chr8:73020450-73020595	146		Y							Y	--	73	--	--	--	--	5.56555	7.02363	1.26198	--	--	--
Crlf1	uc009maj.1	chr8:73021096-73021195	100		Y							Y	--	73	--	--	--	--	5.56555	7.02363	1.26198	--	--	--
AK083927	uc007vit.1	chr15:24914597-24914638	42		Y			ncRNA				N	--	100	--	--	--	--	0.793425	1.01347	1.27734	--	--	--
Usp36	uc011yim.1	chr11:118147968-118148085	118		Y			Y				N	--	50	--	--	--	--	4.83145	6.45766	1.33659	--	--	--
Pafah2	uc008vey.2	chr4:133957549-133957751	203		Y				Y			N	--	100	--	--	--	--	1.31622	1.90509	1.44739	--	--	--
Rgs17	uc007egg.2	chr10:4430642-4430748	107		Y			Y				N	--	71	--	--	--	--	7.33226	11.7423	1.60146	--	--	--
Rgs17	uc007egg.2	chr10:4432803-4432832	29		Y			Y				N	--	36	--	--	--	--	7.33226	11.7423	1.60146	--	--	--
Uggt2	uc007uzj.2	chr14:119399951-119400172	222		Y							Y	--	33	--	--	--	--	2.13469	4.15828	1.94795	--	--	--
Pard3	uc009nzf.2	chr8:130131568-130131715	148			Y						N	--	--	35.5	--	--	--	--	--	--	1.91034	0.371929	-5.1363
Epn1	uc009ezx.1	chr7:5045736-5045833	98			Y						Y	--	--	26.5	--	--	--	--	--	--	44.6107	9.8063	-4.54919
Sh3bgr	uc008acu.1	chr16:96425650-96425694	45			Y	Y					N	--	--	52	--	--	--	--	--	--	673.29	175.649	-3.83316
Immp2l	uc007nll.1	chr12:42737559-42737641	83			Y						Y	--	--	100	--	--	--	--	--	--	10.3056	3.82933	-2.69123
Abhd16a	uc008cfq.1	chr17:35228764-35231195	2432			Y					Y	Y	--	--	32	--	--	--	--	--	--	36.9705	14.1745	-2.60824
Hps5	uc009gzg.2	chr7:54034808-54034837	30			Y	Y					N	--	--	61.5	--	--	--	--	--	--	1.32479	0.523635	-2.52999
Ankrd9	uc007pcj.1	chr12:112217231-112219244	2014			Y		Y				N	--	--	25	--	--	--	--	--	--	12.1907	5.03889	-2.41932
Ankrd9	uc007pcj.1	chr12:112223381-112223505	125			Y		Y				N	--	--	25	--	--	--	--	--	--	12.1907	5.03889	-2.41932
Ankrd9	uc007pcj.1	chr12:112225136-112225342	207			Y			Y			N	--	--	25	--	--	--	--	--	--	12.1907	5.03889	-2.41932
Ndufv2	uc008dgw.1	chr17:66447153-66447313	161			Y						Y	--	--	9	--	--	--	--	--	--	295.608	133.743	-2.21027
Thoc7	uc007sge.1	chr14:14792641-14792730	90			Y		Y				N	--	--	26.5	--	--	--	--	--	--	104.659	47.4934	-2.20365
Rxrg	uc007dlb.2	chr1:169554495-169554572	78			Y		Y				N	--	--	58	--	--	--	--	--	--	31.0759	14.4599	-2.14911
Afap1l1	uc008fcq.1	chr18:61903415-61906431	3017			Y					Y	Y	--	--	41	--	--	--	--	--	--	11.9625	5.57461	-2.14589
Dysf	uc009cou.1	chr6:84105157-84129665	24509			Y					Y	Y	--	--	71.5	--	--	--	--	--	--	2.26217	1.05595	-2.14231
Acyp2	uc007ihw.1	chr11:30525062-30525114	53			Y						N	--	--	4.5	--	--	--	--	--	--	430.315	210.409	-2.04514
Ptpn3	uc008sya.2	chr4:57211358-57217778	6421			Y					Y	Y	--	--	46.5	--	--	--	--	--	--	11.1794	5.93903	-1.88236
Sgcd	uc007ioz.1	chr11:46891238-46891319	82			Y						Y	--	--	44	--	--	--	--	--	--	19.4974	10.441	-1.86739
Ebpl	uc007ufv.2	chr14:61977135-61977212	78			Y						Y	--	--	55.5	--	--	--	--	--	--	2.94649	1.60267	-1.83849
Vdac1	uc007ivm.1	chr11:52169253-52169334	82			Y		Y				N	--	--	4.5	--	--	--	--	--	--	966.871	538.657	-1.79497
Kbtbd3	uc009obj.2	chr9:4312142-4312259	118			Y		Y				N	--	--	76.5	--	--	--	--	--	--	1.77644	1.00569	-1.76639
Pxn	uc008zea.1	chr5:115965783-115966013	231			Y				Y		N	--	--	25	--	--	--	--	--	--	6.98365	4.10643	-1.70066
Ubac2	uc007vao.1	chr14:122296381-122296454	74			Y						Y	--	--	31.5	--	--	--	--	--	--	16.8948	10.3391	-1.63407
Ubac2	uc007vao.1	chr14:122302529-122302586	58			Y						Y	--	--	18	--	--	--	--	--	--	16.8948	10.3391	-1.63407
Stau2	uc007ajn.2	chr1:16506829-16506878	50			Y		Y				N	--	--	71	--	--	--	--	--	--	7.57385	4.72889	-1.60161
Stau2	uc007ajn.2	chr1:16506963-16507016	54			Y		Y				N	--	--	57.5	--	--	--	--	--	--	7.57385	4.72889	-1.60161
Mlxipl	uc008zxt.1	chr5:135605679-135607059	1381			Y						Y	--	--	48	--	--	--	--	--	--	11.8045	7.37145	-1.60138
Trappc9	uc007wbl.2	chr15:72691750-72693009	1260			Y				Y		N	--	--	16	--	--	--	--	--	--	4.64898	2.91415	-1.59531
Scn4a	uc007lyu.1	chr11:106193962-106194079	118			Y						Y	--	--	47.5	--	--	--	--	--	--	56.0496	35.7511	-1.56777
Scn4a	uc007lyu.1	chr11:106195208-106195444	237			Y			Y			N	--	--	47.5	--	--	--	--	--	--	56.0496	35.7511	-1.56777
Cgrrf1	uc007thl.1	chr14:47471464-47471527	64			Y						Y	--	--	18.5	--	--	--	--	--	--	35.7838	23.9778	-1.49237
Chd1	uc007skm.2	chr17:15859639-15860610	972			Y				Y		N	--	--	56	--	--	--	--	--	--	233.225	156.8	-1.4874
Nedd4	uc009qqe.1	chr9:72534110-72534263	154			Y						Y	--	--	15	--	--	--	--	--	--	62.0788	42.3838	-1.46468
Dnaja2	uc009mqa.1	chr8:88069042-88069176	135			Y	Y					N	--	--	7.5	--	--	--	--	--	--	90.9301	62.7603	-1.44885
Abcc9	uc009epn.1	chr6:142609406-142611333	1928			Y				Y		N	--	--	36	--	--	--	--	--	--	23.1316	16.2283	-1.42539
Irf2	uc009lqo.2	chr8:47825418-47825530	113			Y		Y				N	--	--	60	--	--	--	--	--	--	8.34075	6.09852	-1.36767
Irf2	uc009lqo.2	chr8:47825622-47825753	132			Y				Y		N	--	--	60	--	--	--	--	--	--	8.34075	6.09852	-1.36767
Trim55	uc008orw.1	chr3:19548304-19548357	54			Y						N	--	--	20.5	--	--	--	--	--	--	24.4963	17.9618	-1.3638
Trim55	uc008orw.1	chr3:19549975-19550611	637			Y				Y		N	--	--	20.5	--	--	--	--	--	--	24.4963	17.9618	-1.3638
Ddx23	uc007xne.1	chr15:98489783-98490025	243			Y		Y				N	--	--	15.5	--	--	--	--	--	--	26.5308	19.8218	-1.33847
Rbm33	uc008wtz.1	chr5:28655922-28656000	71			Y						Y	--	--	24	--	--	--	--	--	--	4.54633	3.40766	-1.33415
Coq10a	uc007hmk.1	chr10:127805754-127806329	576			Y		Y				N	--	--	26.5	--	--	--	--	--	--	110.905	83.3084	-1.33126
Coq10a	uc007hmk.1	chr10:127807663-127807871	209			Y			Y			N	--	--	26.5	--	--	--	--	--	--	110.905	83.3084	-1.33126
Nudt7	uc009nnw.2	chr8:116670105-116670153	49			Y						Y	--	--	31.5	--	--	--	--	--	--	19.371	14.8288	-1.30631
Agpat3	uc007fxp.1	chr10:77758613-77758725	113			Y		Y				N	--	--	47	--	--	--	--	--	--	5.89586	4.60405	-1.28058
Tns1	uc011wmx.1	chr1:73962212-73962262	51			Y						Y	--	--	67	--	--	--	--	--	--	6.50746	5.17164	-1.2583
Tns1	uc011wmx.1	chr1:73972343-73974169	1827			Y					Y	Y	--	--	18	--	--	--	--	--	--	6.50746	5.17164	-1.2583
Clip4	uc008dna.2	chr17:72188337-72188416	80			Y						N	--	--	27.5	--	--	--	--	--	--	20.5224	16.3821	-1.25273
Tmem117	uc007xjn.1	chr15:94460090-94460162	73			Y		Y				N	--	--	67	--	--	--	--	--	--	10.2159	8.38842	-1.21786
Plcl1	uc007ban.2	chr1:55772638-55772665	28			Y						N	--	--	50	--	--	--	--	--	--	1.07756	0.972481	-1.10805
Rsu1	uc008ijw.1	chr2:13089860-13089896	37			Y						N	--	--	25.5	--	--	--	--	--	--	17.5066	16.6194	-1.05338
Ccndbp1	uc008lxg.1	chr2:120835744-120837169	1426			Y					Y	Y	--	--	12	--	--	--	--	--	--	14.2231	13.992	-1.01652
Fto	uc009mst.2	chr8:93840482-93840579	98			Y						Y	--	--	12.5	--	--	--	--	--	--	25.8422	25.9381	1.00371
Erp44	uc008suy.1	chr4:48289614-48289658	45			Y						Y	--	--	16	--	--	--	--	--	--	17.075	17.1445	1.00407
Tctex1d2	uc007yyt.1	chr16:32420415-32420491	77			Y						Y	--	--	59	--	--	--	--	--	--	14.9187	15.3552	1.02926
Eif4g3	uc008vkd.1	chr4:137619921-137620183	263			Y			Y			N	--	--	43.5	--	--	--	--	--	--	16.1346	16.7679	1.03925
Sema4d	uc007qmo.1	chr13:51788502-51788562	61			Y		3'UTR				N	--	--	32	--	--	--	--	--	--	7.96006	8.39406	1.05452
Psap	uc007fen.2	chr10:59750885-59750923	39			Y	Y					N	--	--	3.5	--	--	--	--	--	--	279.144	294.762	1.05595
Pgpep1	uc009mbc.1	chr8:73182677-73182791	115			Y						Y	--	--	24	--	--	--	--	--	--	5.32637	5.87497	1.103
Sema3c	uc008wnl.1	chr5:17189822-17191102	1281			Y				Y		N	--	--	39	--	--	--	--	--	--	11.965	13.3398	1.1149
Npepps	uc007ldv.1	chr11:97131709-97131735	27			Y						Y	--	--	39	--	--	--	--	--	--	17.8062	20.3528	1.14302
Tep1	uc007tlt.1	chr14:51444837-51446096	1260			Y					Y	Y	--	--	47.5	--	--	--	--	--	--	1.23523	1.42035	1.14987
Zmynd8	uc008nyd.1	chr2:165706588-165706944	357			Y		Y				N	--	--	64	--	--	--	--	--	--	1.0606	1.25663	1.18483
Lmcd1	uc009ddv.2	chr6:112242179-112242319	141			Y						Y	--	--	20.5	--	--	--	--	--	--	65.1197	79.2273	1.21664
Txnrd1	uc007gjz.1	chr10:82325760-82325829	70			Y		Y				N	--	--	17.5	--	--	--	--	--	--	18.739	23.7278	1.26623
Mlip	uc009qtg.2	chr9:77154226-77154278	53			Y		Y				N	--	--	6	--	--	--	--	--	--	9.81172	12.9214	1.31694
Mlip	uc009qtg.2	chr9:77155452-77155782	331			Y			Y			N	--	--	3	--	--	--	--	--	--	9.81172	12.9214	1.31694
Tnrc6b	uc007wvt.1	chr15:80590061-80590225	165			Y					Y	Y	--	--	19	--	--	--	--	--	--	0.929353	1.42808	1.53664
3110082I17Rik	uc009agk.1	chr5:139934472-139934722	251			Y		Y				N	--	--	16.5	--	--	--	--	--	--	5.4053	8.61494	1.59379
Mad2l1bp	uc008cru.2	chr17:46286035-46286066	32			Y						N	--	--	100	--	--	--	--	--	--	11.2992	18.261	1.61613
AK158482	uc008esw.1	chr18:39546408-39546455	48			Y		Y				N	--	--	65.5	--	--	--	--	--	--	0.159511	0.262528	1.64583
Slc16a1	uc008qui.1	chr3:104449950-104450202	253			Y		Y		Y		N	--	--	15.5	--	--	--	--	--	--	9.81372	17.9038	1.82436
Sec63	uc007eyx.2	chr10:42546978-42546993	16			Y						N	--	--	65	--	--	--	--	--	--	5.24597	10.9486	2.08705
Nxn	uc007kfp.2	chr11:76173830-76173975	146			Y			Y			N	--	--	24.5	--	--	--	--	--	--	0.576071	1.33634	2.31975
Zbtb16	uc009pim.1	chr9:48469634-48473259	3626			Y					Y	Y	--	--	68	--	--	--	--	--	--	4.90104	13.7504	2.80561
Chac1	uc008lts.2	chr2:119177373-119177910	538			Y					Y	Y	--	--	17	--	--	--	--	--	--	15.0361	43.411	2.88712
Lnpep	uc008apk.1	chr17:17713717-17713815	99			Y						Y	--	--	39	--	--	--	--	--	--	1.44733	18.7681	12.9674
Gm5860	--	chr4:81729644-81729736	93			Y		ncRNA				N	--	--	67	--	--	--	--	--	--	--	--	--
Il17b	uc008fcl.1	chr18:61835751-61835856	106			Y			Y			N	--	--	100	--	--	--	--	--	--	0.0402623	5.15245	>100
Rhox3h	uc012hgj.1	chrX:35077391-35077475	85			Y			Y			N	--	--	100	--	--	--	--	--	--	0	1.88994	>100

## Sheet: Abbreviations
Abbreviation	Description
Inf. Ins.	Inframe Insertion
UTR	Untranslated Region
Exon Ext.	Exon Extension
NMD	Nonsense Mediated Decay
PSI	Percent Spliced In
FPKM	Fragments Per Kilobase of transcript per Million mapped reads
FC	Fold Change
