# Supplementary material for: Tdp-43 cryptic exons are highly variable between cell types
Source: Springer Nature journal article supplement (doi:10.1186/s13024-016-0144-x), 2017-02-02
Supplement: MOESM1 [file 12038316]

# Supplemental Data

**A**

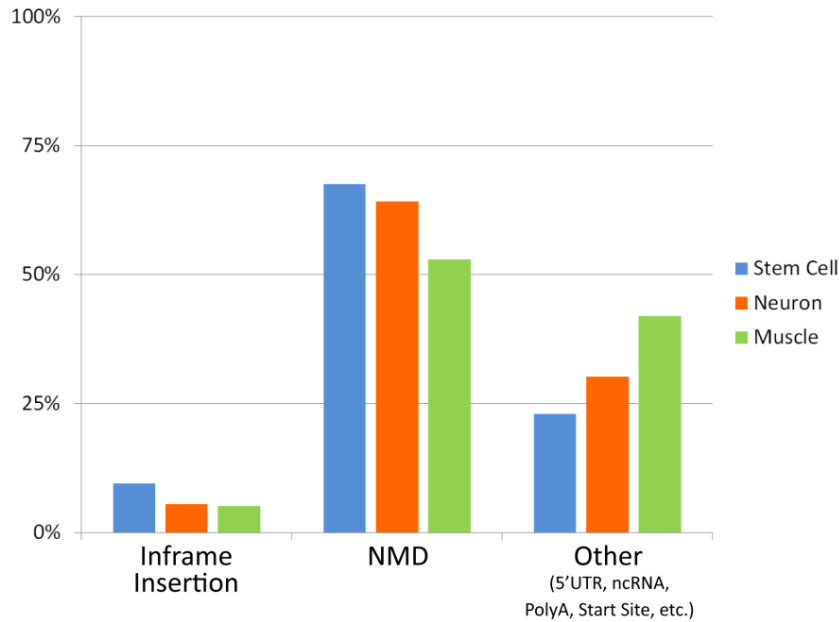

**B**

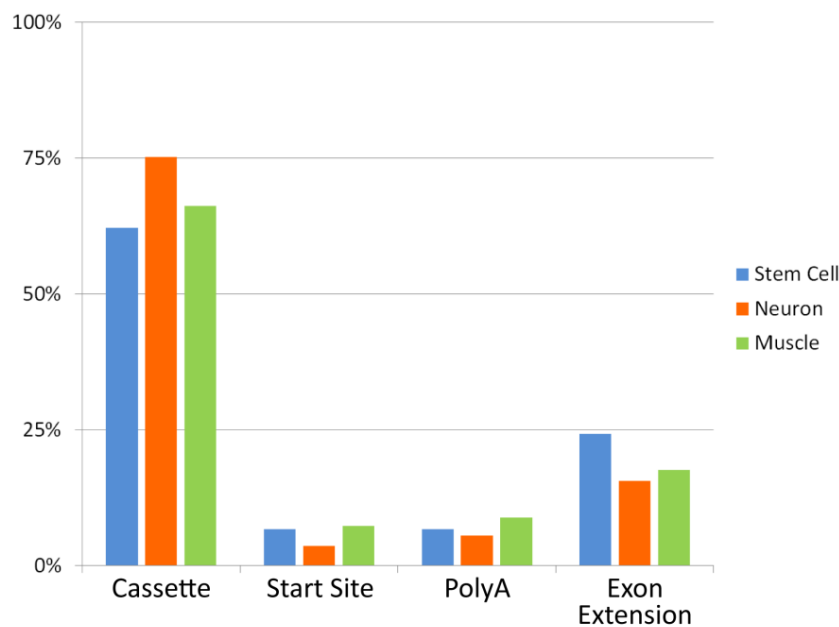

**Fig. S1.** Classification of stem cell, neuron and muscle cryptic exons associated with Tdp-43 loss of function. **(A)** Functional effect of cryptic exons on mRNA. **(B)** General grouping of cryptic exons (cassette exons, alternate start sites, alternate polyadenylation sites, and exon extensions—i.e. alternate 5' or 3' splice site utilization).

A

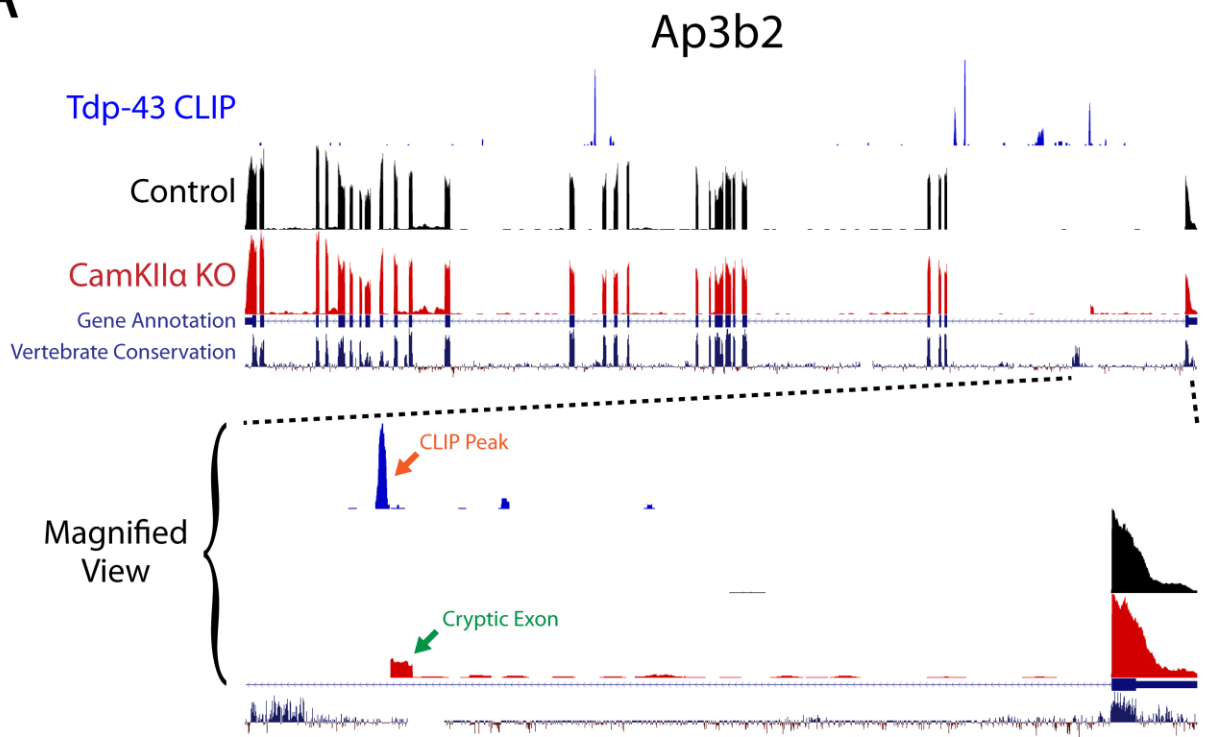

B

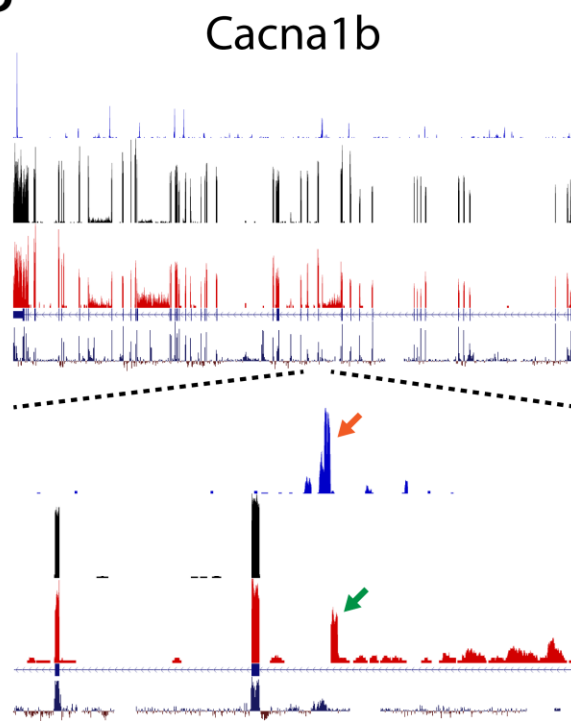

C

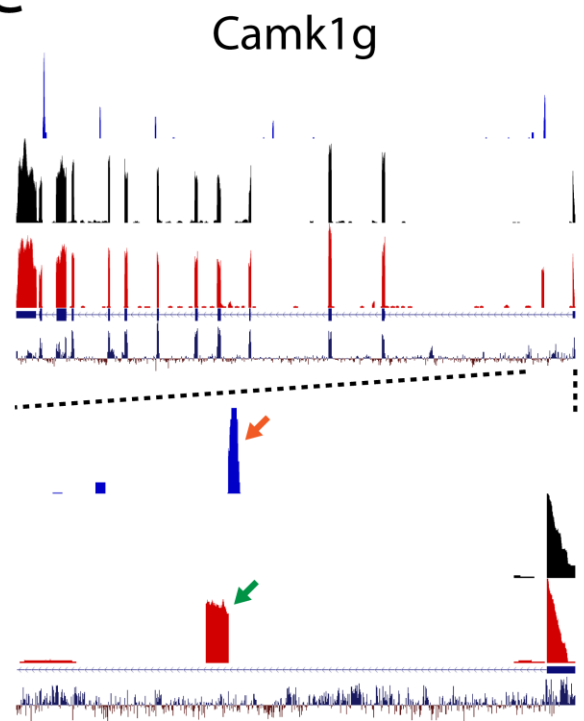

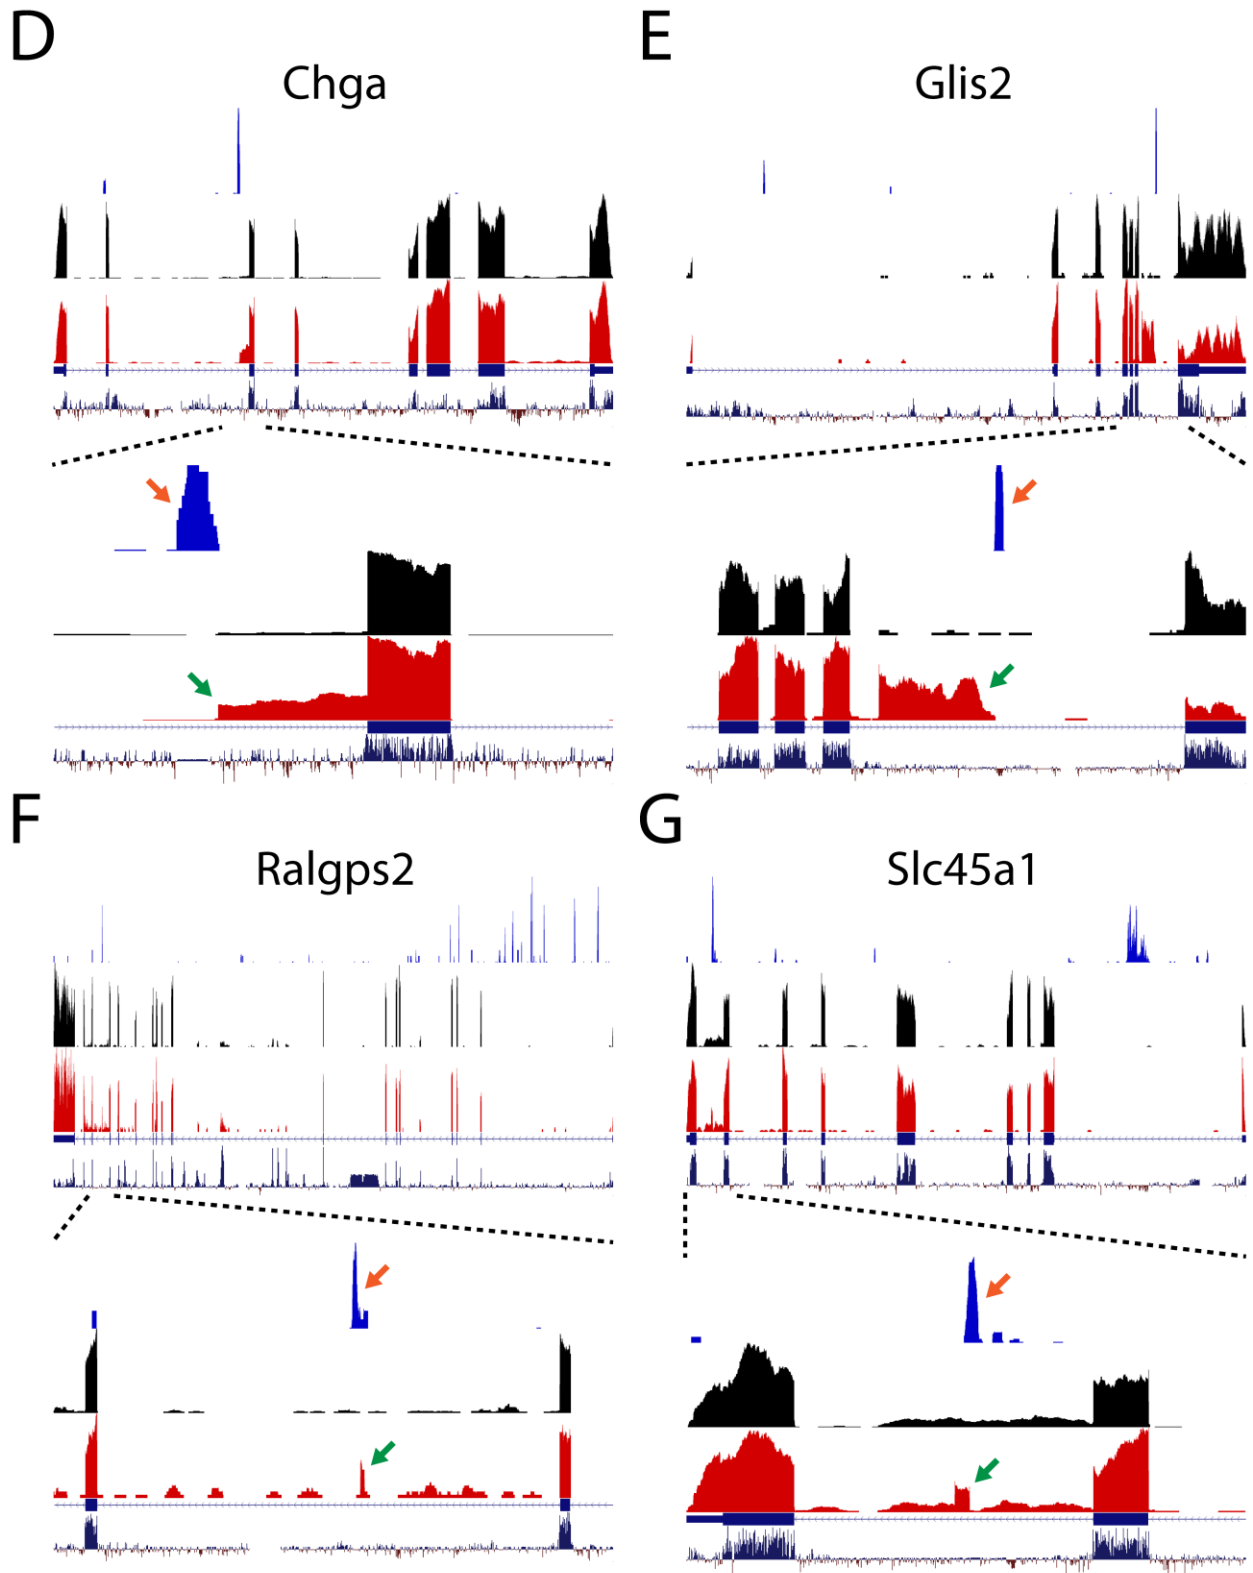

**Fig. S2.** HITS-CLIP peaks correlate with cryptic exons identified in *CaMKII $\alpha$ -Cre;Tardbp<sup>F/F</sup>* knockout mice. HITS-CLIP was previously performed to identify Tdp-43's direct targets in mouse brain (18). (A to G) HITS-CLIP clusters (orange arrows) are adjacent to Tdp-43 cryptic exons (green arrows).

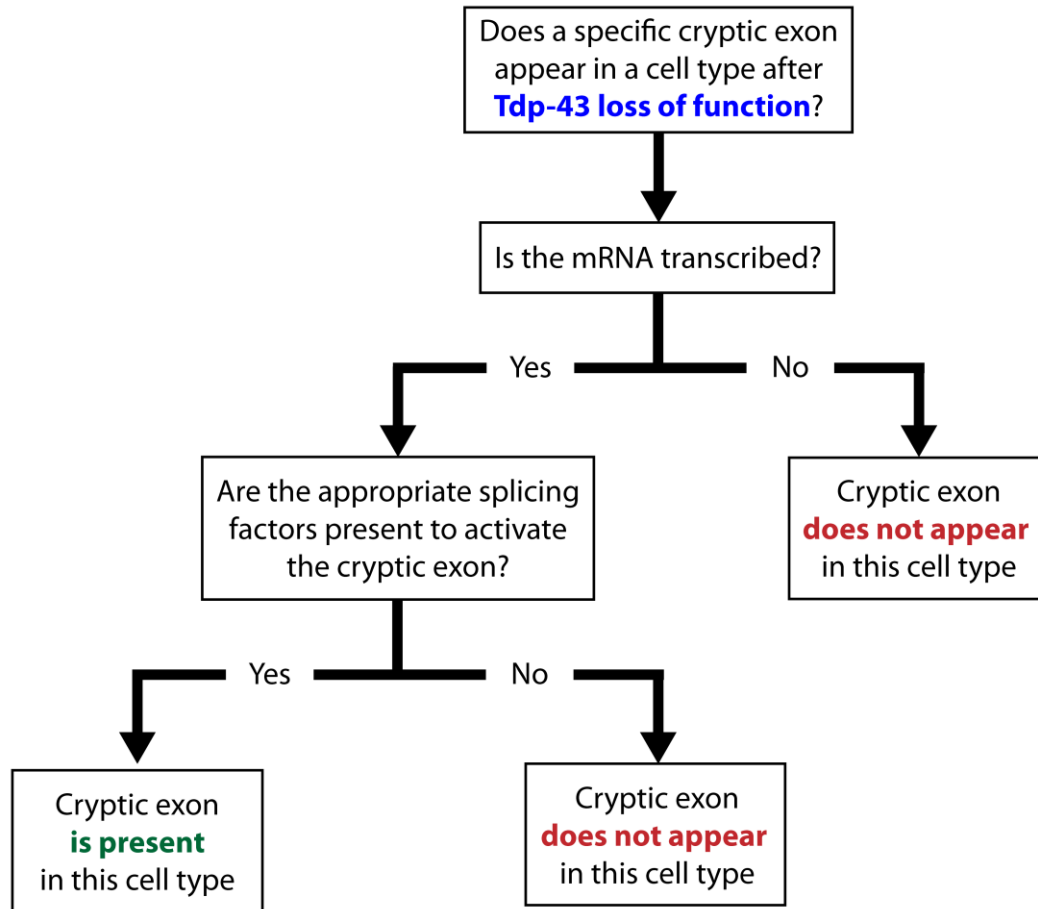

**Fig. S3.** Putative flow chart that governs whether a cryptic exon appears in a specific cell type.

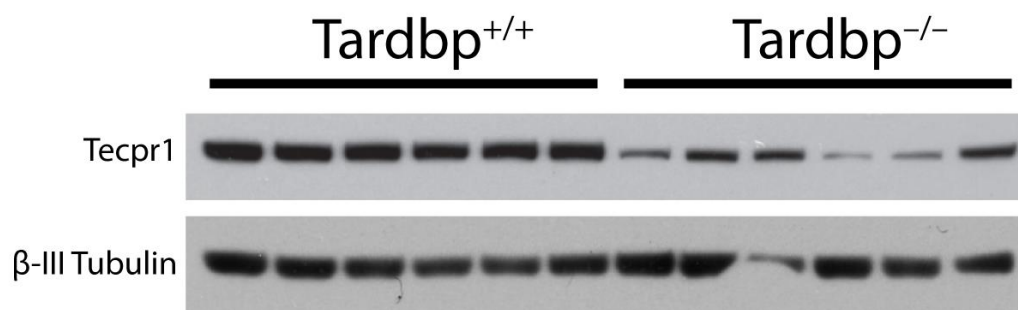

**Fig. S4.** Immunoblot with whole brain extracts from 8mo old female *CamKIIa-Cre;Tardbp<sup>F/F</sup>* knockout mice and controls. After Tdp-43 deletion, the incorporation of a cryptic exon in Tecpr1 leads to nonsense-mediated decay and a reduction in the protein levels of Tecpr1.

| Gene Symbol | Gene Name                                               | Stem Cell | Neuron | Muscle | Keywords                                                            |
|-------------|---------------------------------------------------------|-----------|--------|--------|---------------------------------------------------------------------|
| Pafah2      | Platelet-Activating Factor Acetylhydrolase 2, 40kDa     |           |        |        | Phospholipid lipase; metabolism                                     |
| Cacna1b     | Voltage-Gated Calcium Channel Subunit Alpha Cav2.2      |           |        |        | Voltage-sensitive calcium channel subunit                           |
| Crll1       | Cytokine Receptor-Like Factor 1                         |           |        |        | Cytokine receptor subunit; neuronal survival and development        |
| Fxyd2       | FXD Domain Containing Ion Transport Regulator 2         |           |        |        | Sodium ATPase subunit gamma                                         |
| Glis2       | GLIS Family Zinc Finger 2                               |           |        |        | Transcription factor; neuron differentiation                        |
| Ralgps2     | Ral GEF With PH Domain And SH3 Binding Motif 2          |           |        |        | Guanine nucleotide exchange factor; cytoskeletal organization       |
| Slit3       | Slit Guidance Ligand 3                                  |           |        |        | Axon guidance                                                       |
| Cluh        | Clustered Mitochondria (CluA/CLU1) Homolog              |           |        |        | Mitochondrial distribution and biogenesis                           |
| Tctn2       | Tectonic Family Member 2                                |           |        |        | Hedgehog signaling                                                  |
| Slc45a1     | Solute Carrier Family 45, Member 1                      |           |        |        | pH dependent glucose uptake                                         |
| Rfx1        | MHC Class II Regulatory Factor RFX                      |           |        |        | Regulator of MHC class II gene expression                           |
| Unc13a      | Unc-13 Homolog A (C. Elegans)                           |           |        |        | Neurotransmitter release                                            |
| Ank3        | Ankyrin 3, Node Of Ranvier (Ankyrin G)                  |           |        |        | Regulates nodes of Ranvier and axonal initial segments              |
| Ugg2        | UDP-Glucose Glycoprotein Glucosyltransferase 2          |           |        |        | Reglucosylates unfolded glycoproteins; protein quality control      |
| Numb1       | Numb Homolog (Drosophila)-Like                          |           |        |        | Neurogenesis; neural progenitor cell maintenance                    |
| Pitpnm3     | PITPNM Family Member 3                                  |           |        |        | Membrane lipid transfer                                             |
| Kalrn       | Kalirin, RhoGEF Kinase                                  |           |        |        | Rho guanine nucleotide exchange factor; synapse remodeling          |
| Rasa1       | RAS Protein Activator Like 1 (GAP1 Like)                |           |        |        | Suppressor of Ras signaling; cell proliferation and differentiation |
| Meis2       | Meis Homeobox 2                                         |           |        |        | Homeobox transcription factor                                       |
| Celf5       | CUGBP, Elav-Like Family Member 5                        |           |        |        | RNA-binding protein; pre-mRNA splicing                              |
| Kcnmb4      | Big Potassium Channel Beta Subunit 4                    |           |        |        | Calcium activated potassium channel regulatory subunit              |
| Ntrk3       | Neurotrophic Tyrosine Kinase, Receptor, Type 3          |           |        |        | Neurotrophin signaling                                              |
| Ap3b2       | Adaptor-Related Protein Complex 3, Beta 2 Subunit       |           |        |        | Neuron-specific AP3 vesicle-coat protein complex                    |
| Chga        | Chromogranin A                                          |           |        |        | Neuroendocrine secretory protein                                    |
| St6galnac5  | GalNAc Alpha-2,6-Sialyltransferase V                    |           |        |        | Cell surface sialyltransferase                                      |
| Mrps27      | Mitochondrial Ribosomal Protein S27                     |           |        |        | Mitochondrial ribosomal protein                                     |
| Abr         | Active BCR-Related                                      |           |        |        | GTPase-activating protein; vestibular morphogenesis                 |
| Tub         | Tubby Bipartite Transcription Factor                    |           |        |        | Transcription factor; G protein signal transduction                 |
| Dlg3        | Discs, Large Homolog 3 (Drosophila)                     |           |        |        | NMDA receptor clustering; learning and synaptic plasticity          |
| Aatk        | Apoptosis-Associated Tyrosine Kinase                    |           |        |        | Neuronal differentiation                                            |
| Ppp3ca      | Protein Phosphatase 3, Catalytic Subunit, Alpha Isozyme |           |        |        | Calcium-dependent protein phosphatase                               |
| Cx3cl1      | Chemokine (C-X3-C Motif) Ligand 1                       |           |        |        | Chemotactic for leukocyte adhesion                                  |
| Ak5         | Adenylate Kinase 5                                      |           |        |        | Brain-specific adenylate kinase                                     |
| Ssbp2       | Single-Stranded DNA Binding Protein 2                   |           |        |        | Genome stability                                                    |
| Ip6k1       | Inositol Hexakisphosphate Kinase 1                      |           |        |        | Inositol phosphokinase                                              |
| Add2        | Adducin 2 (Beta)                                        |           |        |        | Promotes assembly of spectrin-actin network                         |

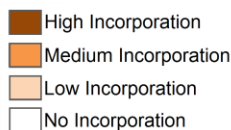

**Table S1.** Neuron-specific cryptic exons impact a unique set of pathways (refer to Excel Data Table for list of cryptic exons).

| Gene Symbol | Gene Name                                           | Stem Cell | Neuron | Muscle | Keywords                                                                       |
|-------------|-----------------------------------------------------|-----------|--------|--------|--------------------------------------------------------------------------------|
| Il17b       | Interleukin 17B                                     |           |        |        | T cell-derived cytokine, similar to IL17                                       |
| Imp2l       | Inner Mitochondrial Membrane Peptidase Subunit 2    |           |        |        | Catalyzes removal of mitochondrial signal peptide sequence                     |
| Mad2l1bp    | MAD2L1 Binding Protein                              |           |        |        | Regulator of late mitosis                                                      |
| Rhox3h      | Reproductive homeobox 3H                            |           |        |        | Homeobox transcription factor                                                  |
| Dysf        | Dysferlin                                           |           |        |        | Congenital myopathies; Ca(2+) sensor; membrane regeneration and repair         |
| Zbtb16      | Zinc Finger And BTB Domain Containing 16            |           |        |        | Transcription factor involved in cell cycle progression                        |
| Tns1        | Tensin 1                                            |           |        |        | Cell migration; focal adhesions and cytoskeleton mediated signal transduction  |
| Sec63       | SEC63 Homolog, Protein Translocation Regulator      |           |        |        | Endoplasmic reticulum protein translocation                                    |
| Irf2        | Interferon Regulatory Factor 2                      |           |        |        | Interferon regulatory transcription factor                                     |
| Chd1        | ATP-Dependent Helicase CHD1                         |           |        |        | ATP-dependent chromatin remodeling; transcription                              |
| Plcl1       | Phospholipase C-Like 1                              |           |        |        | Inositol phospholipid-based intracellular signaling; no phospholipase activity |
| Mxipl       | MLX Interacting Protein-Like                        |           |        |        | Transcriptional repressor                                                      |
| Scn4a       | Sodium Channel Protein Type IV Subunit Alpha        |           |        |        | Voltage-gated sodium channel                                                   |
| Tep1        | Telomerase-Associated Protein 1                     |           |        |        | Telomerase ribonucleoprotein complex                                           |
| Ptpn3       | Protein Tyrosine Phosphatase, Non-Receptor Type 3   |           |        |        | Tyrosine phosphatase; cytoskeletal regulation                                  |
| Sgcd        | Sarcoglycan, Delta                                  |           |        |        | Dystrophin-glycoprotein complex; muscular dystrophy; dilated cardiomyopathy    |
| Eif4g3      | Eukaryotic Translation Initiation Factor 4 Gamma, 3 |           |        |        | Probable translation initiation factor                                         |
| Afap111     | Actin Filament Associated Protein 1-Like 1          |           |        |        | May be involved in podosome and invadosome formation                           |
| Lnpep       | Leucyl/Cystinyl Aminopeptidase                      |           |        |        | Aminopeptidase that cleaves peptide hormones                                   |
| Npepps      | Aminopeptidase Puromycin Sensitive                  |           |        |        | Peptidase with broad specificity; regulates cell growth and viability          |
| Sema3c      | Semaphorin-E                                        |           |        |        | Semaphorin receptor binding                                                    |
| Abcc9       | Sulfonylurea Receptor 2                             |           |        |        | ATP-sensitive potassium channels; cardiomyopathy dilated type 10               |
| Pard3       | Par-3 Family Cell Polarity Regulator                |           |        |        | Asymmetrical cell division and cell polarization                               |
| Abhd16a     | Abhydrolase Domain Containing 16A                   |           |        |        | MHC Class III; immunity                                                        |
| Nudt7       | Nucleoside Diphosphate-Linked Moiety X Motif 7      |           |        |        | Cleaves coenzyme A; Nudix hydrolase family                                     |
| Coq10a      | Coenzyme Q10A                                       |           |        |        | Coenzyme Q chaperone; oxidative respiration                                    |
| Epn1        | Epsin 1                                             |           |        |        | Clathrin vesicle binding; endocytosis                                          |
| Rsu1        | Ras Suppressor Protein 1                            |           |        |        | Ras signal transduction pathway                                                |
| Pxn         | Paxillin                                            |           |        |        | Cytoskeletal protein; cell adhesion                                            |
| Nxn         | Nucleoredoxin                                       |           |        |        | Redox-dependent negative regulator of Wnt signaling                            |
| Pgpep1      | Pyroglutamyl-Peptidase I                            |           |        |        | Hydrolyzes N-terminal pyroglutamyl residues                                    |
| Lmcd1       | LIM And Cysteine-Rich Domains 1                     |           |        |        | Transcriptional cofactor                                                       |
| Trim55      | Tripartite Motif Containing 55                      |           |        |        | Gene expression and protein turnover in muscle cells                           |
| Tnrc6b      | Trinucleotide Repeat Containing 6B                  |           |        |        | RNA-mediated gene silencing                                                    |
| Cgrrf1      | Cell Growth Regulatory Gene 19 Protein              |           |        |        | Able to inhibit growth in several cell lines                                   |
| Chac1       | Cation Transport Regulator-Like Protein 1           |           |        |        | Glutathione depletion; apoptosis initiation; Notch signaling                   |
| Erp44       | Endoplasmic Reticulum Protein 44                    |           |        |        | Retention in early secretory pathway, endoplasmic reticulum                    |
| Trappc9     | Trafficking Protein Particle Complex 9              |           |        |        | Activator of NF-κB signaling                                                   |
| Nedd4       | Cell Proliferation-Inducing Gene 53 Protein         |           |        |        | E3 ubiquitin-protein ligase; lysosome degradation                              |
| Fto         | Fat Mass And Obesity Associated                     |           |        |        | Dioxygenase; repair of alkylated DNA and RNA; body size and fat regulation     |
| Ccndbp1     | Cyclin D-Type Binding-Protein 1                     |           |        |        | Cyclin D; may negatively regulate cell cycle progression                       |
| Ndufv2      | NADH-Ubiquinone Oxidoreductase 24 KDa Subunit       |           |        |        | Core subunit of mitochondrial complex I                                        |
| Acyp2       | Acylphosphatase 2, Muscle Type                      |           |        |        | Acylphosphatase activity, membrane pumps (Ca2+/Mg2+-ATPase)                    |

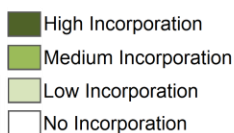

**Table S2.** Muscle-specific cryptic exons impact a unique set of pathways (refer to Excel Data Table for list of cryptic exons).

| Gene Symbol | Gene Name                                                               | Stem Cell | Neuron | Muscle | Keywords                               |
|-------------|-------------------------------------------------------------------------|-----------|--------|--------|----------------------------------------|
| Spata7      | Spermatogenesis Associated 7                                            |           |        |        | Retinal dystrophy; spermatogenesis     |
| Spcs2       | Signal Peptidase Complex Subunit 2 Homolog (S. Cerevisiae)              |           |        |        | Microsomal signal peptidase complex    |
| Hace1       | HECT Domain And Ankyrin Repeat Containing E3 Ubiquitin Protein Ligase 1 |           |        |        | E3 ubiquitin ligase; Golgi regulation  |
| Kctd10      | Potassium Channel Tetramerization Domain Containing 10                  |           |        |        | Cell proliferation                     |
| Fam96a      | Family With Sequence Similarity 96, Member A                            |           |        |        | Chromosome segregation                 |
| Gsta4       | Glutathione S-Transferase Alpha 4                                       |           |        |        | Cellular detoxification                |
| Tnfaip1     | Tumor Necrosis Factor, Alpha-Induced Protein 1 (Endothelial)            |           |        |        | Cytoskeleton structure; cell migration |
| Lrrc49      | Leucine Rich Repeat Containing 49                                       |           |        |        | Microtubule regulation                 |
| R3hdm2      | R3H Domain Containing 2                                                 |           |        |        | Nucleic acid binding                   |
| Sh3bgr      | SH3 Domain Binding Glutamate-Rich Protein                               |           |        |        | SH3 domain binding                     |
| Hps5        | Hermansky-Pudlak Syndrome 5                                             |           |        |        | Vesicular trafficking                  |
| Dnaja2      | DnaJ (Hsp40) Homolog, Subfamily A, Member 2                             |           |        |        | Hsc70 co-chaperone                     |
| Psap        | Prosaposin                                                              |           |        |        | Precursor for saposins A, B, C and D   |

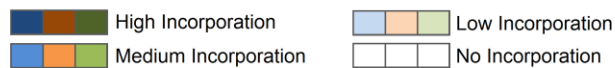

**Table S3.** Mouse cryptic exons predicted to introduce inframe insertions into mRNA.

| Gene Symbol  | UCSC ID    | Cryptic Exon Location (mm) | Cryptic Exon Location (bp) | Present in Neuron | Present in Myocyte | Inf. | UTR | Start Site | Poly A | Exon Ext. | Predicted NMD | Stem Cell Cryptic PSI | Neuron Cryptic PSI | Myocyte Cryptic PSI | Stem Cell CTRL (FPM) | Stem Cell KO (FPM) | Stem Cell CTRL vs KO (FC) | Neuron CTRL (FPM) | Neuron KO (FPM) | Neuron CTRL vs KO (FC) | Myocyte CTRL (FPM) | Myocyte KO (FPM) | Myocyte CTRL vs KO (FC) |
|--------------|------------|----------------------------|----------------------------|-------------------|--------------------|------|-----|------------|--------|-----------|---------------|-----------------------|--------------------|---------------------|----------------------|--------------------|---------------------------|-------------------|-----------------|------------------------|--------------------|------------------|-------------------------|
| Phab6        | uc008krv.1 | chr8:3524948-3525233       |                            | 286               | Y                  | Y    |     |            |        |           | N             | 56                    | 44                 | 73                  | 4.4                  | 0.4                | -1.3                      | 3.7               | 3.0             | -1.3                   | 0.2                | 1.0              | 6.4                     |
| Ubp15        | uc008krm.1 | chr5:64731056-64731165     |                            | 110               | Y                  | Y    |     |            | Y      |           | N             | 64                    | 44                 | 22                  | 0.5                  | 0.1                | -0.8                      | 4.1               | 2.4             | -1.7                   | 3.2                | 0.7              | -4.9                    |
| Ubp15        | uc007hgo.1 | chr10:122588018-122588181  |                            | 164               | Y                  | Y    |     |            |        |           | Y             | 82                    | 14                 | 39                  | 17.9                 | 2.0                | -9.1                      | 5.4               | 3.7             | -1.5                   | 19.0               | 4.1              | -4.7                    |
| Ubp15        | uc007hgo.1 | chr10:122588018-122588181  |                            | 12631             | Y                  | Y    |     |            | Y      |           | Y             | 86                    | 14                 | 39                  | 17.9                 | 2.0                | -9.1                      | 5.4               | 3.7             | -1.5                   | 19.0               | 4.1              | -4.7                    |
| Adipor2      | uc008hne.1 | chr6:119118778-119119936   |                            | 59                | Y                  | Y    |     |            |        |           | Y             | 74                    | 13                 | 36                  | 76.3                 | 23.8               | -3.2                      | 14.5              | 15.2            | 1.0                    | 18.9               | 11.0             | -1.7                    |
| Chit11       | uc008gsw.1 | chr3:97393284-97395493     |                            | 414               | Y                  | Y    |     |            | Y      |           | Y             | 4                     | 52                 | 75                  | 23.0                 | 9.8                | -2.3                      | 3.0               | 5.1             | 1.7                    | 5.5                | 2.8              | -2.0                    |
| Prd2         | uc007rpm.1 | chr13:100095403-100095425  |                            | 302               | Y                  | Y    |     |            |        |           | N             | 23                    | 11                 | 71                  | 34.7                 | 14.9               | -2.3                      | 13.3              | 11.2            | -1.2                   | 16.7               | 3.4              | -5.1                    |
| Scf26        | uc008hfm.1 | chr8:108692855-108693156   |                            | 41                | Y                  | Y    |     |            | Y      |           | N             | 44                    | 59                 | 92                  | 11.2                 | 6.2                | -1.8                      | 2.9               | 2.8             | -1.0                   | 1.4                | 0.8              | -1.7                    |
| Pvpr2        | uc007dvw.2 | chr1:18284662-182847402    |                            | 41                | Y                  | Y    |     |            | Y      |           | Y             | 13                    | 49                 | 5                   | 12.4                 | 77.0               | -1.6                      | 16.6              | 13.9            | -1.2                   | 9.8                | 6.2              | -1.6                    |
| Temp1        | uc009ba1.1 | chr5:144976607-144976659   |                            | 53                | Y                  | Y    |     |            |        |           | Y             | 98                    | 35                 | 52                  | 2.9                  | 1.9                | -1.6                      | 17.5              | 4.3             | -4.1                   | 3.4                | 0.9              | -4.0                    |
| 3110091ERIK  | uc007gh.2  | chr11:122022910-122022969  |                            | 60                | Y                  | Y    |     |            | Y      |           | N             | 67                    | 33                 | 23                  | 3.1                  | 3.7                | -1.4                      | 1.4               | 1.5             | 1.1                    | 4.2                | 0.9              | -1.4                    |
| Wiscr22      | uc008bcu.1 | chr17:46810105-46810288    |                            | 184               | Y                  | Y    |     |            |        |           | Y             | 13                    | 26                 | 9                   | 5.2                  | 25.1               | -1.4                      | 8.0               | 8.6             | 1.1                    | 7.2                | 7.2              | -1.0                    |
| Wiscr22      | uc008kxm.1 | chr5:135539651-135539735   |                            | 103               | Y                  | Y    |     |            | Y      |           | Y             | 35                    | 23                 | 40                  | 3.3                  | 46.6               | -1.4                      | 11.2              | 12.7            | -1.1                   | 13.3               | 10.4             | -1.3                    |
| Sars         | uc008gub.1 | chr3:108245655-108245759   |                            | 103               | Y                  | Y    |     |            | Y      |           | Y             | 1                     | 3                  | 11                  | 238.7                | 179.3              | -1.4                      | 179.3             | 48.0            | -1.1                   | 46.4               | 20.9             | -2.2                    |
| Hepat        | uc008hlg.1 | chr8:27056471-27056468     |                            | 48                | Y                  | Y    |     |            |        |           | N             | 17                    | 34                 | 45                  | 22.6                 | 16.5               | -1.4                      | 16.7              | 18.8            | -1.1                   | 9.5                | 6.6              | -1.4                    |
| Glet         | uc008eah.1 | chr6:5494089-54942165      |                            | 97                | Y                  | Y    |     |            |        |           | N             | 47                    | 32                 | 32                  | 24.3                 | 18.1               | -1.3                      | 8.6               | 4.4             | -1.9                   | 7.2                | 1.7              | -4.2                    |
| Brsn1        | uc007hpa.1 | chr12:5696461-56966078     |                            | 1918              | Y                  | Y    |     |            | Y      |           | Y             | 9                     | 9                  | 81                  | 15.7                 | 11.9               | -1.3                      | 23.6              | 11.3            | -2.1                   | 7.4                | 3.7              | -2.0                    |
| 5m2b9        | uc007oca.1 | chr12:8261094-82611038     |                            | 245               | Y                  | Y    |     |            |        |           | N             | 79                    | 72                 | 99                  | 17.2                 | 13.1               | -1.3                      | 15.5              | 13.6            | -1.1                   | 16.8               | 8.4              | -2.0                    |
| 261007B1RK   | uc007hr.2  | chr11:78077562-78077768    |                            | 207               | Y                  | Y    |     |            | Y      |           | Y             | 26                    | 1                  | 30                  | 55.0                 | 42.8               | -1.3                      | 39.4              | 31.4            | -1.3                   | 69.5               | 33.4             | -2.1                    |
| Spnt1        | uc007gc.1  | chr11:1108384-117108637    |                            | 284               | Y                  | Y    |     |            | Y      |           | Y             | 9                     | 2                  | 11                  | 89.0                 | 72.6               | -1.2                      | 14.1              | 15.3            | -1.1                   | 40.7               | 36.1             | -1.1                    |
| Brp9         | uc007rg.1  | chr12:99872801-99872854    |                            | 54                | Y                  | Y    |     |            |        |           | N             | 100                   | 100                | 100                 | 7.4                  | 6.6                | -1.1                      | 6.3               | 4.6             | -1.4                   | 0.2                | 1.1              | 5.6                     |
| Wdr1         | uc008ku.1  | chr13:74090398-74090395    |                            | 38                | Y                  | Y    |     |            |        |           | N             | 23                    | 17                 | 36                  | 11.5                 | 10.5               | -1.1                      | 14.2              | 15.2            | -1.1                   | 3.1                | 2.7              | -1.1                    |
| Smg3         | uc008ku.1  | chr4:102834577-102834447   |                            | 21                | Y                  | Y    |     |            |        |           | N             | 11                    | 19                 | 30                  | 10.2                 | 9.5                | -1.1                      | 2.1               | 2.0             | -1.1                   | 3.3                | 3.1              | -1.1                    |
| Smg3         | uc008pu.1  | chr3:88144571-88144855     |                            | 115               | Y                  | Y    |     |            |        |           | Y             | 26                    | 19                 | 68                  | 41.7                 | 39.1               | -1.1                      | 16.2              | 16.3            | -1.0                   | 11.0               | 22.9             | 2.1                     |
| Hba4         | uc008pu.1  | chr3:94038097-94038158     |                            | 62                | Y                  | Y    |     |            |        |           | Y             | 33                    | 24                 | 68                  | 41.7                 | 39.1               | -1.1                      | 16.2              | 16.3            | -1.0                   | 11.0               | 22.9             | 2.1                     |
| Hba4         | uc007dh.1  | chr1:94038097-94038158     |                            | 62                | Y                  | Y    |     |            |        |           | Y             | 26                    | 20                 | 100                 | 1.0                  | 1.0                | -1.0                      | 4.5               | 3.7             | -1.2                   | 2.1                | 4.6              | 2.2                     |
| Admp2        | uc008hsk.1 | chr5:123006915-123007000   |                            | 86                | Y                  | Y    |     |            |        |           | Y             | 29                    | 41                 | 28                  | 5.7                  | 5.5                | -1.0                      | 9.8               | 10.0            | -1.2                   | 2.2                | 2.2              | 2.3                     |
| Rtfd4        | uc008hsk.1 | chr18:80334892-80335043    |                            | 152               | Y                  | Y    |     |            |        |           | Y             | 96                    | 76                 | 100                 | 27.7                 | 28.2               | 1.0                       | 5.6               | 7.3             | 1.3                    | 0.9                | 7.9              | 3.1                     |
| Fam135a      | uc008bwc.1 | chr2:17220952-17221713     |                            | 822               | Y                  | Y    |     |            | Y      |           | Y             | 2                     | 5                  | 1                   | 33.0                 | 33.7               | 1.0                       | 28.0              | 26.3            | -1.1                   | 15.2               | 10.7             | -1.4                    |
| Smr2         | uc007ank.2 | chr1:24029346-24031051     |                            | 1706              | Y                  | Y    |     |            |        |           | N             | 55                    | 29                 | 49                  | 1.3                  | 1.4                | 1.2                       | 21.3              | 2.0             | 1.8                    | 2.9                | 1.7              | -1.7                    |
| Smr2         | uc008md.1  | chr7:107404923-107405024   |                            | 102               | Y                  | Y    |     |            | Y      |           | Y             | 15                    | 102                | 9                   | 30.8                 | 36.8               | 1.2                       | 1.1               | 2.0             | 1.2                    | 16.0               | 16.4             | 1.0                     |
| Crem         | uc008ka.2  | chr18:3278079-3278283      |                            | 180               | Y                  | Y    |     |            | Y      |           | N             | 100                   | 68                 | 80                  | 0.0                  | 0.4                | 29.5                      | 2.4               | 0.9             | -2.5                   | 1.1                | 1.7              | 1.6                     |
| A230046KORIK | uc007gh.1  | chr10:8303672-83037869     |                            | 198               | Y                  | Y    |     |            |        |           | Y             | 80                    | 20                 | --                  | 29.1                 | 9.1                | -3.2                      | 9.2               | 5.1             | --                     | --                 | --               | --                      |
| Hecet1       | uc007ht.2  | chr10:45359574-45359609    |                            | 36                | Y                  | Y    |     |            |        |           | N             | 51                    | 30                 | --                  | 10.5                 | 7.7                | -1.4                      | 10.1              | 7.9             | -1.3                   | --                 | --               | --                      |
| Apr          | uc007ht.1  | chr11:76278083-76282079    |                            | 3937              | Y                  | Y    |     |            |        |           | N             | 32                    | 4                  | --                  | 8.7                  | 6.5                | -1.3                      | 59.7              | 20.4            | -2.9                   | --                 | --               | --                      |
| Hb1          | uc008hm.2  | chr5:123006942-123007000   |                            | 59                | Y                  | Y    |     |            |        |           | Y             | 22                    | 21                 | --                  | 5.7                  | 5.5                | -1.0                      | 9.8               | 10.0            | -1.0                   | --                 | --               | --                      |
| Vn13d        | uc017dcx.1 | chr6:14468935-14468936     |                            | 112               | Y                  | Y    |     |            |        |           | Y             | 18                    | 46                 | --                  | 6.8                  | 7.0                | 1.0                       | 4.6               | 1.9             | -2.4                   | --                 | --               | --                      |
| Repl1        | uc009at.1  | chr5:14283773-14283862     |                            | 90                | Y                  | Y    |     |            |        |           | N             | 25                    | 100                | --                  | 4.6                  | 4.8                | 1.0                       | 1.5               | 0.6             | --                     | --                 | --               | --                      |
| Repl1b       | uc007hm.1  | chr10:17253243-11753402    |                            | 160               | Y                  | Y    |     |            |        |           | N             | 2                     | 7                  | --                  | 52.8                 | 59.6               | 1.1                       | 32.6              | 27.1            | -1.2                   | --                 | --               | --                      |
| Kcd10        | uc008vrm.2 | chr5:11482680-114826875    |                            | 96                | Y                  | Y    |     |            | 30UR   |           | N             | 34                    | 33                 | --                  | 11.1                 | 18.5               | 1.7                       | 15.7              | 16.3            | 1.0                    | --                 | --               | --                      |
| Ubp2         | uc007uj.2  | chr4:119399951-119400992   |                            | 1042              | Y                  | Y    |     |            | Y      |           | Y             | 68                    | 30                 | --                  | 6.0                  | 13.5               | 2.3                       | 2.1               | 4.2             | 19                     | --                 | --               | --                      |
| Nine1        | uc008hs.1  | chr9:109740387-109740534   |                            | 148               | Y                  | Y    |     |            |        |           | Y             | 19                    | --                 | --                  | 25.7                 | 12.0               | -2.1                      | --                | --              | --                     | --                 | --               | --                      |
| Mett10       | uc009kcm.1 | chr7:14006512-14007654     |                            | 53                | Y                  | Y    |     |            |        |           | Y             | 8                     | --                 | --                  | 21.9                 | 12.5               | -1.7                      | --                | --              | --                     | 4.2                | 3.8              | -1.1                    |
| Gtf2c2       | uc009hlu.2 | chr8:34848447-34849451     |                            | 1005              | Y                  | Y    |     |            | Y      |           | N             | 32                    | --                 | --                  | 4.9                  | 29.5               | -1.6                      | --                | --              | --                     | 5.7                | 5.6              | -1.0                    |
| Mett16       | uc007sxa.1 | chr14:3202355-3202505      |                            | 151               | Y                  | Y    |     |            |        |           | Y             | 10                    | --                 | --                  | 20.7                 | 15.9               | -1.3                      | --                | --              | --                     | 3.1                | 3.1              | 1.0                     |
| Tnk2         | uc008hhu.2 | chr19:36951510-36953724    |                            | 2215              | Y                  | Y    |     |            | Y      |           | Y             | 3                     | --                 | --                  | 148.4                | 118.3              | -1.3                      | --                | --              | --                     | 3.9                | 24.5             | -1.3                    |
| Ubp2d1       | uc007fo.2  | chr10:7026333-70263465     |                            | 133               | Y                  | Y    |     |            |        |           | Y             | 71                    | --                 | --                  | 5.9                  | 4.8                | -1.2                      | --                | --              | --                     | 193.8              | 116.2            | -1.7                    |
| Pip6c        | uc008ou.1  | chr2:39056407-39060352     |                            | 3946              | Y                  | Y    |     |            | Y      |           | Y             | 33                    | --                 | --                  | 49.4                 | 41.8               | -1.2                      | --                | --              | --                     | 27.4               | 23.5             | -1.2                    |
| Club         | uc007kca.1 | chr11:7463197-7463680      |                            | 484               | Y                  | Y    |     |            | Y      |           | Y             | 37                    | --                 | --                  | 13.7                 | 11.6               | -1.2                      | --                | --              | --                     | 13.7               | 7.0              | -2.0                    |
| Ppp2a        | uc007rw.1  | chr13:113596569-113596934  |                            | 66                | Y                  | Y    |     |            |        |           | Y             | 9                     | --                 | --                  | 4.3                  | 45.2               | 1.1                       | --                | --              | --                     | 16.3               | 19.0             | 1.2                     |
| Fam63a       | uc009gh.1  | chr9:65985845-65985946     |                            | 102               | Y                  | Y    |     |            | Y      |           | N             | 2                     | --                 | --                  | 55.3                 | 60.7               | 1.1                       | --                | --              | --                     | 44.1               | 38.4             | -1.1                    |
| Lmb1         | uc008wne.1 | chr5:29672685-29672822     |                            | 138               | Y                  | Y    |     |            |        |           | N             | 11                    | --                 | --                  | 3.4                  | 4.0                | 1.2                       | --                | --              | --                     | 4.5                | 3.6              | -1.2                    |
| Flam2        | uc008hlg.2 | chr2:15554476-15554523     |                            | 1098              | Y                  | Y    |     |            | Y      |           | Y             | 48                    | --                 | --                  | 9.9                  | 13.0               | 1.3                       | --                | --              | --                     | 1.9                | 2.6              | 1.4                     |
| Pir          | uc008w.2   | chr3:160707510-16070765    |                            | 36                | Y                  | Y    |     |            | Y      |           | N             | 45                    | --                 | --                  | 14.1                 | 20.4               | 1.4                       | --                | --              | --                     | 3.9                | 2.5              | -1.6                    |
| Trn8         | uc008hs.1  | chr19:46577504-46581418    |                            | 3915              | Y                  | Y    |     |            | Y      |           | N             | 57                    | --                 | --                  | 28.4                 | 45.3               | 1.6                       | --                | --              | --                     | 7.3                | 7.9              | 1.1                     |
| Ubp2         | uc007uj.2  | chr14:119399951-119400466  |                            | 356               | Y                  | Y    |     |            |        |           | Y             | 34                    | --                 | --                  | 6.0                  | 13.5               | 2.3                       | --                | --              | --                     | 0.1                | 0.6              | 5.8                     |
| Spd13        | uc011ma.1  | chr14:61321802-61321959    |                            | 158               | Y                  | Y    |     |            | Y      |           | N             | 45                    | --                 | --                  | 3.6                  | 0.5                | -6.9                      | --                | --              | --                     | --                 | --               | --                      |
| Fam73a       | uc008rte.2 | chr13:1955521-151955675    |                            | 155               | Y                  | Y    |     |            |        |           | Y             | 52                    | --                 | --                  | 13.4                 | 4.1                | -3.2                      | --                | --              | --                     | --                 | --               | --                      |
| Ahr1d        | uc008rte.2 | chr5:31354907-31355004     |                            | 98                | Y                  | Y    |     |            | Y      |           | Y             | 18                    | --                 | --                  | 40.1                 | 21.4               | -1.9                      | --                | --              | --                     | --                 | --               | --                      |
| Mbt1         | uc008ec.1  | chr18:10769157-10769215    |                            | 42                | Y                  | Y    |     |            |        |           | Y             | 33                    | --                 | --                  | 10.3                 | 5.5                | -1.9                      | --                | --              | --                     | --                 | --               | --                      |
| Gsta4        | uc008qy.2  | chr9:78055004-78055045     |                            | 59                | Y                  | Y    |     |            |        |           | N             | 9                     | --                 | --                  | 596.2                | 326.6              | -1.8                      | --                | --              | --                     | --                 | --               | --                      |
| Lrp          | uc008hkg.2 | chr6:7437672-7437725       |                            | 54                | Y                  | Y    |     |            | Y      |           | Y             | 19                    | --                 | --                  | 3.8                  | 3.0                | -1.3                      | --                | --              | --                     | --                 | --               | --                      |
| Ncap1        | uc009gh.1  | chr6:12285542-12285633     |                            | 92                | Y                  | Y    |     |            |        |           | Y             | 11                    | --                 | --                  | 35.3                 | 31.2               | -1.1                      | --                | --              | --                     | --                 | --               | --                      |
| Snpp3        | uc008hku.1 | chr4:8308491-8308497       |                            | 137               | Y                  | Y    |     |            |        |           | Y             | 8                     | --                 | --                  | 9.8                  | 7.5                | -1.1                      | --                | --              | --                     | --                 | --               | --                      |
| Sufl1        | uc007ha.2  | chr11:12830579-12831017    |                            | 439               | Y                  | Y    |     |            | Y      |           | Y             | 25                    | --                 | --                  | 8.2                  | 9.0                | -1.1                      | --                | --              | --                     | --                 | --               | --                      |
| Zf13         | uc008od.2  | chr9:2240980-2241097       |                            | 118               | Y                  | Y    |     |            | Y      |           |               |                       |                    |                     |                      |                    |                           |                   |                 |                        |                    |                  |                         |



[illegible]

**Table S4.** Tdp-43 cryptic exons found in mouse stem cell, muscle and neuron (refer to Excel Data Table). Inf.Ins., Inframe Insertion; Exon Ext., Exon Extension; NMD, Nonsense-mediated decay, PSI; Percent Spliced In.
